# Supplementary material for: Measures and Policies for Reducing PM Exceedances through the Use of Air Quality Modeling: The Case of Thessaloniki, Greece
Source: MDPI journal article supplement (doi:10.3390/su15020930), 2023-01-04
Supplement: s1 [file s1]

Supplementary material of “Measures and policies for reducing PM exceedances through the use of air quality modeling: The case of Thessaloniki, Greece”

Athena Progiou\*, Natalia Liora, Ioannis Sebos, Christina Chatzimichail and Dimitrios Melas

Figure S1. Contribution of pollution sources in PM<sub>10</sub> emissions in winter.

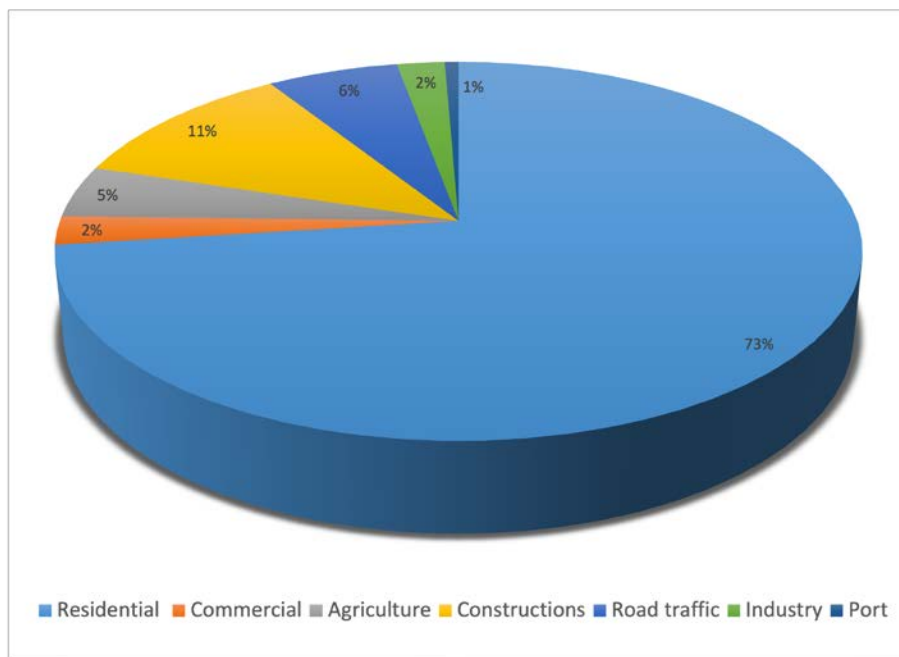

Figure S2. Spatial distribution of mean daily simulated PM<sub>2.5</sub> concentration levels (in  $\mu\text{g}/\text{m}^3$ ) over the study area of Thessaloniki for the winter (a) and summer (b) study period of 2019 for the base case scenario.

### Daily mean PM<sub>2.5</sub> concentration

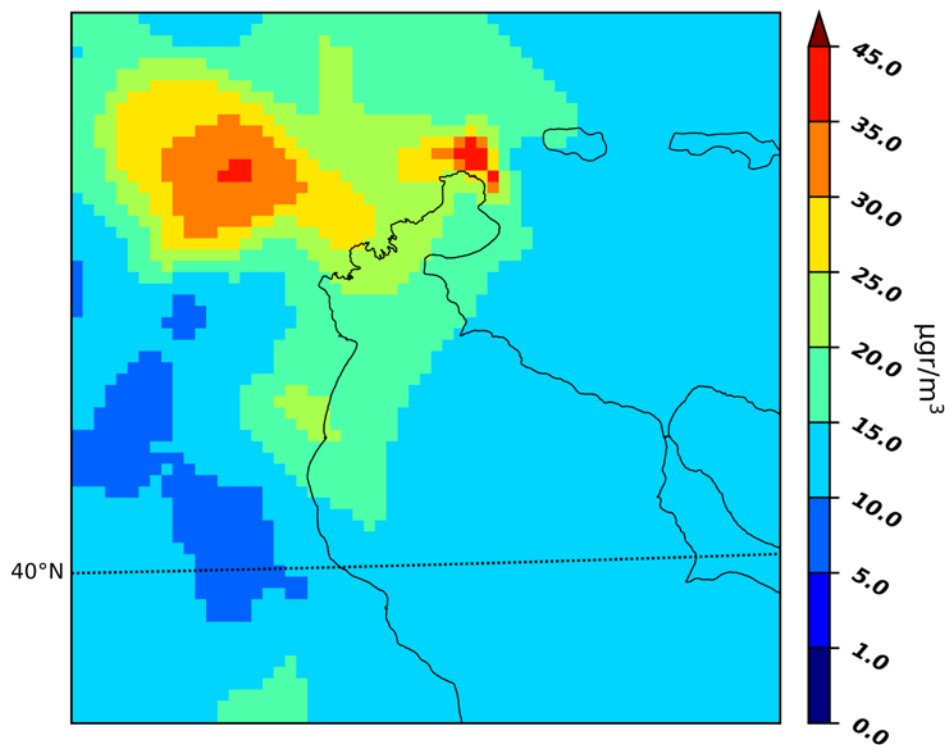

Domain wide:  
**MEAN=14.196726406405666**  
**MED=12.52539295383862**  
**STD=5.754728326944992**  
**MAX=41.99634792975017**  
**MIN=0.0**

a)

## Daily mean PM<sub>2.5</sub> concentration

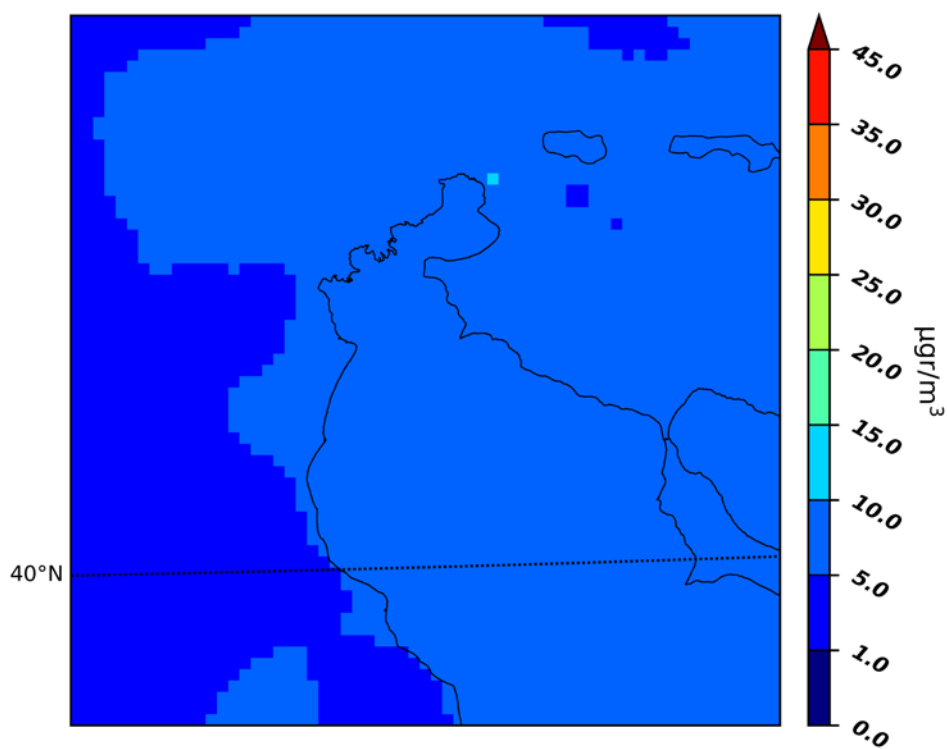

**Domain wide:**  
**MEAN=5.480805347608458**  
**MED=5.751266346091316**  
**STD=1.3143168876929432**  
**MAX=12.213741637411573**  
**MIN=0.0**

b)
